# Supplementary material
Source: HighWire-hosted journal article supplement (doi:10.1101/rna.079738.123)
Supplement: Supplemental_Information.docx [file Supplemental_Information.docx]

**Supplemental Materials**

**Table 1.** Reference protein sequences used in this study.

| Protein | GenBank accession number |
| --- | --- |
| FCE | AMN83561.1 |
| VCE D1R | AAO89385.1 |
| VCE D12L | AAO89396.1 |
| ASFV RNA capping enzyme | QZK26801.1 |
| hRNGTT | NP_003791.3 |
| hRNMT | NP_001365064.1 |
| Cet1 | KZV07283.1 |
| Ceg1 | CAA60705.1 |
| Abd1 | AAA34383.1 |
| *Paramecium bursaria* Chlorella virus GTase | AAC96471.1 |
| *Mimivirus* RNA capping enzyme | AAV50651.1 |

**Table 2.** RNA oligonucleotides used in this study.

| Name | Sequence |
| --- | --- |
| pppG-25mer | pppGUAGAACUUCGUCGAGUACGCUCAA |
| pppA-25mer | pppAUAGAACUUCGUCGAGUACGCUCAA |
| Oligo-01 | pppGUAGAACUUCGUCGAG[FAM-dT]ACGCUCAA |
| Oligo-02 | pppGAACCAGUCUUCG[FAM-dT]CGAGUACGGGU |
| Oligo-03 | pppGGGCAAGUCUUCG[FAM-dT]CGAGUACUUGC |
| Oligo-04 | pppGGCAAGUCUUCG[FAM-dT]CGAGUACUUGC |
| Oligo-05 | pppGCAAGUCUUCG[FAM-dT]CGAGUACUUGC |
| Oligo-06 | pppGCAAGUCUUCG[FAM-dT]CGAGUACUUGCGG |
| Oligo-07 | pppGCAAGUCUUCG[FAM-dT]CGAGUACUUGCG |

**Supplemental Figures Legends**

**Suppl. Fig. 1 (A)** Structures of multi-domain capping enzymes from Faustovirus, Vaccinia, and Mimivirus. The full length FCE and Mimivirus capping enzyme structures were predicted using ColabFold while the VCE D1R and D12L subunits were extracted from the CryoEM co-transcriptional capping complex (PDB ID 6RIE). Domain organizations are annotated. **(B)** Structural alignment of TPase domains from Faustovirus and Mimivirus capping enzymes.The predicted structure of FCE TPase was aligned to X-ray crystal structure of the TPase domain from MCE (PDB ID 2QY2). The inset and sequence alignment show the conserved TPase active site motif.  **(C)** FCE secondary structure prediction, active site residues (highlighted in black), and conserved active site motifs (highlighted in grey), with “H” representing an α-helix and “S” representing a β-pleated sheet.

**Suppl. Fig. 2 (A)** Verification of m7Gppp- caps generated by FCE. Synthetic RNA containing 25 nucleotides with a guanosine or an adenosine as the first nucleotide were treated with or without FCE followed by treatment with the nucleoside digestion mix containing Nuclease P1, CIP, and DNase I. The digested reactions were subjected to UPLC analysis. The areas under the designated peaks were used to calculate the fraction of indicated species after correcting for their extinction coefficients. The values were normalized to that of cytidines. **(B)** Reaction products of FCE component enzyme activities. Reactions were carried out to allow for the designated activities to take place. The reactions were quenched and analyzed by capillary electrophoresis. A no enzyme control shows the major peak in the electropherogram as the unreacted substrate (5¢ triphosphate RNA). In the absence of GTP and SAM, FCE converted the 5¢ triphosphate into diphosphate in Rxn 1. When supplemented with GTP, FCE converted the 5¢ triphosphate of the substrate RNA into the Gppp- cap structure (Rxn 2). In the presence of GTP and SAM, the 5’ triphosphate group was converted to the m7Gppp- cap structure (Rxn 3).

**Suppl. Fig. 3** SDS-PAGE analysis of the FCE and VCE lots used in Fig. 4A. Eight microliters of 1 μM of FCE lot A and B and VCE lot A and B were mixed with 4 μL of 3x SDS-loading dye (NEB) and analyzed by SDS-PAGE using a 10-20% Novex Tris-Glycine Gel (ThermoFisher) against a protein size ladder (NEB #P7719S). The gel was stained using SimplyBlue™ SafeStain (ThermoFisher). The gel image was acquired using the Licor Odyssey® M system and densitometry was performed using the Amersham Typhoon RGB laser scanner. A single band with slightly lower electrophoretic mobility than the 95 kDa ladder band was observed for both of the FCE lots, consistent with the expected molecular weight of 100 kDa. Bands with similar electrophoretic mobility as the 95 kDa and 34 kDa ladder bands were observed for both of the VCE lots, consistent with the expected molecule weight of 97 and 33 kDa of the D1R and D12L subunits of VCE, respectively. Densitometry of the image indicated that all four lots exhibited purity higher than 95% and that the protein concentration of the lots are comparable.

**Suppl. Fig. 4** Detailed results of capping efficiency on structured model RNA. The distribution of reaction substrate (ppp-), intermediate products (pp- and Gppp-), and final product (m7Gppp-) of the FCE and VCE reactions represented in Fig. 9 are shown.

**Suppl. Fig. 5** One-pot Cap-1 incorporation using FCE and Vaccinia virus 2′-O-methyltransferase. Fifty or 100 nM of FCE was incubated with 0.5 μM of a *FLuc* *in vitro* transcript at 37°C for 1 h in the presence or absence of 5 U/uL Vaccinia virus cap 2′-O-methyltransferase. The capping reactions were then analyzed by an RNase H-LC-MS based method (Chan et al. 2022). More than 95% of the *FLuc* transcripts contained the Cap-1 structure (orange). Similar levels of Cap-1 incorporation have been observed on other *in vitro* transcripts (data not shown).
